# Supplementary material
Source: Elsevier journal article supplement (https://www.sciencedirect.com/science/article/pii/S0213911114000806)
Supplement: mmc1 [file S0213911114000806:mmc1.docx]

| **Apéndice**  **Tabla I**  Modelo final. Variables introducidas: grupo de edad, morbilidad (ACRG3c), consumo de recetas de farmacia > percentil 95, hospitalización de agudos, consumo de medicación hospitalaria de dispensación ambulatoriaa,b. | | | | | | | | |
| --- | --- | --- | --- | --- | --- | --- | --- | --- |
|  | B | ET | Wald | gl | Sig. | Exp(B) | IC95% para EXP(B) | |
| Inferior | Superior |
| Grupo de edad |  |  | 335,674 | 9 | 0,000 |  |  |  |
| 1-14 a | -1,340 | 0,337 | 15,782 | 1 | 0,000 | 0,262 | 0,135 | 0,507 |
| 15-24 a | -0,556 | 0,321 | 2,997 | 1 | 0,083 | 0,574 | 0,306 | 1,076 |
| 25-34 a | -0,168 | 0,306 | 0,303 | 1 | 0,582 | 0,845 | 0,464 | 1,540 |
| 35-44 a | -0,118 | 0,305 | 0,150 | 1 | 0,698 | 0,889 | 0,489 | 1,614 |
| 45-54 a | 0,156 | 0,303 | 0,265 | 1 | 0,607 | 1,169 | 0,645 | 2,119 |
| 55-64 a | 0,379 | 0,302 | 1,574 | 1 | 0,210 | 1,461 | 0,808 | 2,643 |
| 65-74 a | 0,724 | 0,302 | 5,768 | 1 | 0,016 | 2,063 | 1,142 | 3,726 |
| 75-84 a | 0,916 | 0,302 | 9,205 | 1 | 0,002 | 2,499 | 1,383 | 4,516 |
| > 84 a | 0,777 | 0,308 | 6,357 | 1 | 0,012 | 2,175 | 1,189 | 3,979 |
| Morbilidad (ACRG3c) |  |  | 997,361 | 43 | 0,000 |  |  |  |
| 11 Sanos (no usuarios) | -1,313 | 0,178 | 54,158 | 1 | 0,000 | 0,269 | 0,190 | 0,382 |
| 12 Embarazo con Parto sin otras enfermedades significativas | 0,411 | 0,461 | 0,793 | 1 | 0,373 | 1,508 | 0,611 | 3,722 |
| 14 Embarazo sin parto sin otras enfermedades significativas | 1,859 | 0,228 | 66,577 | 1 | 0,000 | 6,414 | 4,105 | 10,024 |
| 15 Diagnósticos crónicos significativos sin otras enfermedades significativas | 0,808 | 0,130 | 38,876 | 1 | 0,000 | 2,243 | 1,740 | 2,892 |
| 20 Historia de enfermedad crónica menor única | 0,770 | 0,131 | 34,321 | 1 | 0,000 | 2,160 | 1,669 | 2,795 |
| 22 Embarazo con parto con otras enfermedades significativas | -0,263 | 1,011 | 0,068 | 1 | 0,795 | 0,769 | 0,106 | 5,572 |
| 24 Embarazo sin parto con otras enfermedades significativas | 1,742 | 0,238 | 53,455 | 1 | 0,000 | 5,711 | 3,580 | 9,110 |
| 25 Diagnósticos crónicos significativos con otras enfermedades significativas | 1,372 | 0,169 | 66,064 | 1 | 0,000 | 3,942 | 2,832 | 5,487 |
| 31 Enfermedad crónica menor única nivel-1 | 1,019 | 0,101 | 102,295 | 1 | 0,000 | 2,772 | 2,275 | 3,377 |
| 32 Enfermedad crónica menor única nivel-2 | 1,678 | 0,182 | 84,621 | 1 | 0,000 | 5,352 | 3,744 | 7,652 |
| 41 Enfermedad crónica menor en varios órganos nivel-1 | 1,119 | 0,192 | 33,976 | 1 | 0,000 | 3,060 | 2,101 | 4,458 |
| 42 Enfermedad crónica menor en varios órganos nivel-2 | 1,844 | 0,395 | 21,775 | 1 | 0,000 | 6,319 | 2,913 | 13,708 |
| 43 Enfermedad crónica menor en varios órganos nivel-3 | 1,658 | 0,241 | 47,331 | 1 | 0,000 | 5,251 | 3,274 | 8,421 |
| 44 Enfermedad crónica menor en varios órganos nivel-4 | 2,917 | 0,505 | 33,348 | 1 | 0,000 | 18,488 | 6,869 | 49,760 |
| 51 Enfermedad crónica dominante única nivel-1 | 1,360 | 0,084 | 263,535 | 1 | 0,000 | 3,897 | 3,307 | 4,592 |
| 52 Enfermedad crónica dominante única nivel-2 | 1,862 | 0,104 | 318,522 | 1 | 0,000 | 6,436 | 5,246 | 7,897 |
| 53 Enfermedad crónica dominante única nivel-3 | 1,581 | 0,191 | 68,524 | 1 | 0,000 | 4,857 | 3,341 | 7,062 |
| 54 Enfermedad crónica dominante única nivel-4 | 1,923 | 0,318 | 36,571 | 1 | 0,000 | 6,838 | 3,667 | 12,751 |
| 55 Enfermedad crónica dominante única nivel-5 | 1,906 | 0,297 | 41,184 | 1 | 0,000 | 6,725 | 3,758 | 12,037 |
| 56 Enfermedad crónica dominante única nivel-6 | -18,860 | 15.232,655 | 0,000 | 1 | 0,999 | 0,000 | 0,000 |  |
| 61 Dos Enfermedades crónicas dominantes nivel-1 | 1,729 | 0,094 | 339,409 | 1 | 0,000 | 5,637 | 4,690 | 6,776 |
| 62 Dos Enfermedades crónicas dominantes nivel-2 | 2,078 | 0,118 | 308,662 | 1 | 0,000 | 7,987 | 6,335 | 10,071 |
| 63 Dos Enfermedades crónicas dominantes nivel-3 | 2,491 | 0,142 | 309,260 | 1 | 0,000 | 12,078 | 9,149 | 15,943 |
| 64 Dos Enfermedades crónicas dominantes nivel-4 | 2,475 | 0,180 | 189,208 | 1 | 0,000 | 11,882 | 8,351 | 16,907 |
| 65 Dos Enfermedades crónicas dominantes nivel-5 | 2,591 | 0,235 | 121,111 | 1 | 0,000 | 13,342 | 8,411 | 21,166 |
| 66 Dos Enfermedades crónicas dominantes nivel-6 | 1,308 | 0,621 | 4,446 | 1 | 0,035 | 3,701 | 1,097 | 12,488 |
| 71 Tres Enfermedades crónicas dominantes nivel-1 | 2,043 | 0,262 | 60,990 | 1 | 0,000 | 7,710 | 4,618 | 12,873 |
| 72 Tres Enfermedades crónicas dominantes nivel-2 | 2,328 | 0,270 | 74,221 | 1 | 0,000 | 10,253 | 6,038 | 17,411 |
| 73 Tres Enfermedades crónicas dominantes nivel-3 | 2,393 | 0,293 | 66,468 | 1 | 0,000 | 10,943 | 6,156 | 19,452 |
| 74 Tres Enfermedades crónicas dominantes nivel-4 | 1,276 | 0,513 | 6,190 | 1 | 0,013 | 3,584 | 1,311 | 9,797 |
| 75 Tres Enfermedades crónicas dominantes nivel-5 | 2,725 | 0,569 | 22,961 | 1 | 0,000 | 15,261 | 5,006 | 46,526 |
| 76 Tres Enfermedades crónicas dominantes nivel-6 | 22,051 | 27.133,744 | 0,000 | 1 | 0,999 |  | 0,000 |  |
| 81 Enfermedad neoplásica dominante, metastásica o complicada nivel-1 | 2,116 | 0,626 | 11,413 | 1 | 0,001 | 8,295 | 2,431 | 28,305 |
| 82 Enfermedad neoplásica dominante, metastásica o complicada nivel-2 | 1,642 | 0,297 | 30,624 | 1 | 0,000 | 5,166 | 2,888 | 9,242 |
| 83 Enfermedad neoplásica dominante, metastásica o complicada nivel-3 | 1,606 | 0,341 | 22,181 | 1 | 0,000 | 4,985 | 2,555 | 9,727 |
| 84 Enfermedad neoplásica dominante, metastásica o complicada nivel-4 | 1,537 | 0,445 | 11,951 | 1 | 0,001 | 4,653 | 1,946 | 11,124 |
| 85 Enfermedad neoplásica dominante, metastásica o complicada nivel-5 | -0,424 | 1,249 | 0,115 | 1 | 0,734 | 0,655 | 0,057 | 7,564 |
| 91 Condiciones catastróficas nivel-1 | 2,993 | 0,655 | 20,853 | 1 | 0,000 | 19,940 | 5,519 | 72,037 |
| 92 Condiciones catastróficas nivel-2 | 4,311 | 0,342 | 158,641 | 1 | 0,000 | 74,530 | 38,104 | 145,776 |
| 93 Condiciones catastróficas nivel-3 | 4,216 | 0,684 | 37,965 | 1 | 0,000 | 67,749 | 17,722 | 259,005 |
| 94 Condiciones catastróficas nivel-4 | 2,730 | 0,632 | 18,679 | 1 | 0,000 | 15,326 | 4,445 | 52,849 |
| 95 Condiciones catastróficas nivel-5 | 2,740 | 0,810 | 11,452 | 1 | 0,001 | 15,487 | 3,168 | 75,709 |
| 96 Condiciones catastróficas nivel-6 | 1,665 | 1,303 | 1,632 | 1 | 0,201 | 5,286 | 0,411 | 68,004 |
| Coste recetas farmacia año 1 > percentil 95 = "Sí" | 1,792 | 0,052 | 1.205,319 | 1 | 0,000 | 6,001 | 5,424 | 6,640 |
| Hospitalización agudos año 1 = "Sí" | 0,279 | 0,076 | 13,594 | 1 | 0,000 | 1,321 | 1,139 | 1,532 |
| Consumo medicación hospitalaria de dispensación ambulatoria año 1 = "Sí" | 1,949 | 0,148 | 172,883 | 1 | 0,000 | 7,021 | 5,251 | 9,388 |
| Constante | -4,461 | 0,297 | 224,929 | 1 | 0,000 | 0,012 |  |  |
|  |  |  |  |  |  |  |  |  |
| a Se incluye sólo la población presente ambos años del estudio. |  |  |  |  |  |  |  |  |
| b Categorías de referencia: |  |  |  |  |  |  |  |  |
| Grupo de edad: < 1 a |  |  |  |  |  |  |  |  |
| Morbilidad (ACRG3c): 10 sanos |  |  |  |  |  |  |  |  |
| Coste recetas farmacia año 1 > percentil 95 = "No" |  |  |  |  |  |  |  |  |
| Hospitalización agudos año 1 = "No" |  |  |  |  |  |  |  |  |
| Consumo medicación hospitalaria de dispensación ambulatoria año 1 = "No" |  |  |  |  |  |  |  |  |
| c ACRG3: *aggregated clinical risk groups level 3*. |  |  |  |  |  |  |  |  |
